# Supplementary material
Source: publisher figshare collection journal article supplement (https://acs.figshare.com/ndownloader/files/28562892)
Supplement: Supplementary file 1 [file 28562892]

**In-furnace control of arsenic vapor emissions using Fe<sub>2</sub>O<sub>3</sub> microspheres with  
good sintering resistance**

Bing Song<sup>a</sup>, Kaiping Yuan<sup>b</sup>, Yuexing Wei<sup>c</sup>, Dandan Chen<sup>d</sup>, Fanyue Meng<sup>a</sup>, Qi Cao<sup>a</sup>,  
Min Song<sup>a\*</sup>, Huan Liu<sup>e\*</sup>

*<sup>a</sup>Ministry of Education of Key Laboratory of Energy Thermal Conversion and  
Control, School of Energy and Environment, Southeast University, Nanjing, Jiangsu  
210096, China*

*<sup>b</sup>State Key Laboratory of ASIC and System, School of Microelectronics, Fudan  
University, Shanghai 200433, China*

*<sup>c</sup>College of Environmental Science and Engineering, Taiyuan University of  
Technology, Taiyuan, Shanxi, 030024, China*

*<sup>d</sup>School of Energy & Mechanical Engineering, Nanjing Normal University, Nanjing,  
Jiangsu 210023, China*

*<sup>e</sup>School of Energy and Power Engineering, Huazhong University of Science and  
Technology, Wuhan, Hubei, 430070, China*

*\*Corresponding author. Min Song and Huan Liu*

*Email: minsong@seu.edu.cn (M. Song)*

*[huanliu@hust.edu.cn](mailto:huanliu@hust.edu.cn) (H. Liu)*

*ORCID:*

*Min Song: 0000-0002-0002-0568*

*Huan Liu: 0000-0001-6322-9513*

**Table. S1** BET specific surface areas of raw Fe<sub>2</sub>O<sub>3</sub> and tested Fe<sub>2</sub>O<sub>3</sub>

|                                                     | Raw Fe <sub>2</sub> O <sub>3</sub><br>particles | Tested Fe <sub>2</sub> O <sub>3</sub><br>particles<br>(1000 °C) | Tested Fe <sub>2</sub> O <sub>3</sub><br>particles<br>(1300 °C) | Raw Fe <sub>2</sub> O <sub>3</sub><br>microsphere<br>s | Tested Fe <sub>2</sub> O <sub>3</sub><br>microspheres<br>(1000 °C) | Tested Fe <sub>2</sub> O <sub>3</sub><br>microspheres<br>(1300 °C) |
|-----------------------------------------------------|-------------------------------------------------|-----------------------------------------------------------------|-----------------------------------------------------------------|--------------------------------------------------------|--------------------------------------------------------------------|--------------------------------------------------------------------|
| BET specific<br>surface area<br>(m <sup>2</sup> /g) | 16.45                                           | 0.42                                                            | -                                                               | 8.13                                                   | 6.09                                                               | 5.32                                                               |

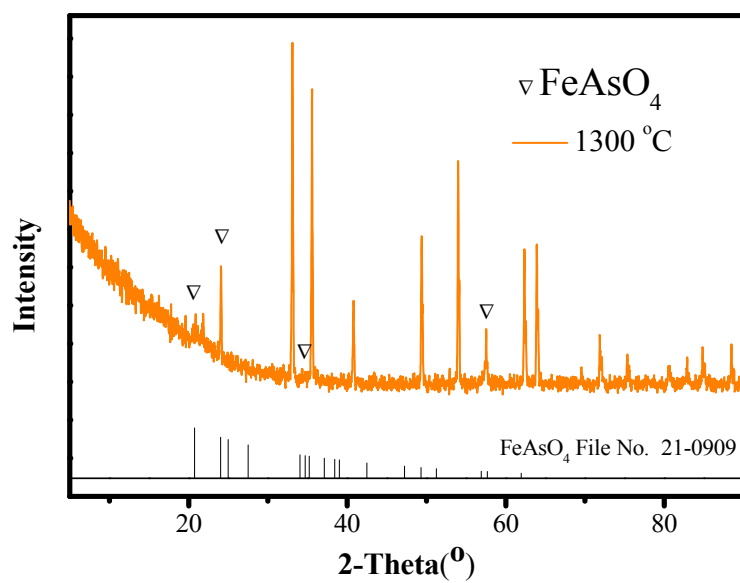

**Fig. S1 XRD pattern of product obtained at 1300 °C**

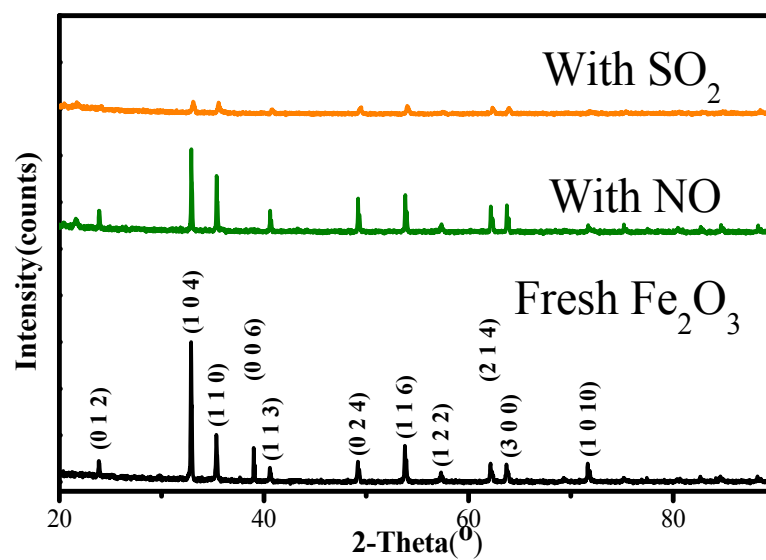

**Fig. S2** XRD patterns of the fresh Fe<sub>2</sub>O<sub>3</sub> and tested Fe<sub>2</sub>O<sub>3</sub>
